# Supplementary material for: Freestanding ultralight metallic micromesh for high-energy density flexible transparent supercapacitors
Source: Royal Society of Chemistry journal article supplement (doi:10.1039/d2ta06251h), 2022-01-01
Supplement: d2ta06251h1.pdf [file d2ta06251h1.pdf]

## Supporting Information

### **Freestanding Ultralight Metallic Micromesh for High-energy Density Flexible Transparent Supercapacitors**

*Guanhua Zhang<sup>a,b</sup>, Yanli Zhao<sup>a</sup>, Jin Hu<sup>a</sup>, Huaizhi Liu<sup>a</sup>, Tianwei Chen<sup>a</sup>, Huihuang Yu<sup>a</sup>,  
and Huigao Duan<sup>a,b\*</sup>*

<sup>a</sup> State Key Laboratory of Advanced Design and Manufacturing for Vehicle Body

College of Mechanical and Vehicle Engineering, Hunan University, Changsha, 410082,  
PR. China.

<sup>b</sup> Greater Bay Area Institute for Innovation, Hunan University, Guangzhou 511300,  
Guangdong Province, China

Correspondence should be addressed to Huigao Duan; [duanhg@hnu.edu.cn](mailto:duanhg@hnu.edu.cn)

## Section 1. Calculation method:

The areal capacitance  $C_s$  and  $C_g$  were calculated from the GCD curves through the following equations:

$$C_s = \frac{I \times \Delta t}{S \times 3600} \quad (1)$$

$$C_g = \frac{I \times \Delta t}{m \times \Delta V} \quad (2)$$

Where  $C_s$  (mAh cm<sup>-2</sup>) and  $C_g$  (F g<sup>-1</sup>) are the specific capacitance,  $S$  (cm<sup>2</sup>) is the geometric area of the electrodes,  $I$  (mA cm<sup>-2</sup>) is the charge/discharge current density, and  $\Delta t$  (s) is the discharge time,  $\Delta V$  (V) is the potential window and  $m$  (mg) is the loading mass of the active material. The energy density ( $E$ , Wh cm<sup>-2</sup>) and power density ( $P$ , W cm<sup>-2</sup>) were calculated by equation (3) and (4) as follows:

$$E = \frac{C_s \times \Delta V^2}{2} \quad (3)$$

$$P = \frac{E}{\Delta t} \quad (4)$$

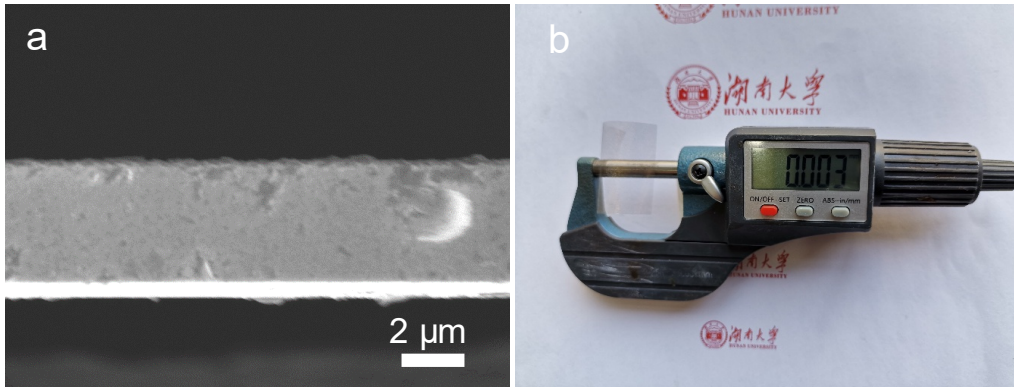

**Fig 1.** (a) SEM image of cross-sectional of NM. (b) Micrometer for measuring the cross-sectional thickness of NM.

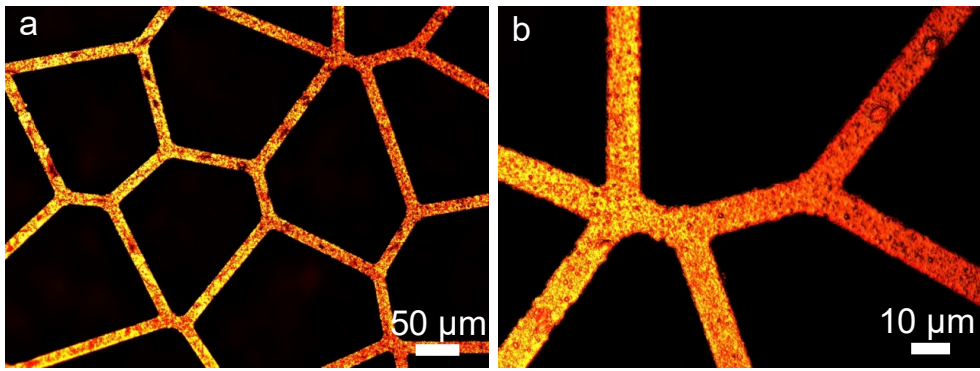

**Fig 2.** Optical microscope image of NM@NiCoP.

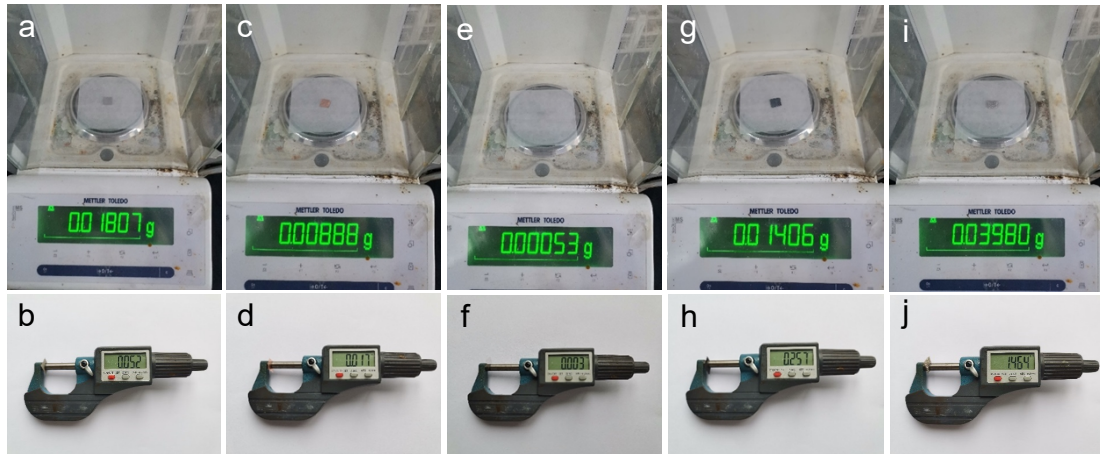

**Fig 3.** Weight (a,c,e,g,i) and thickness measurement (b,d,f,h,j) of  $1 \times 1 \text{ cm}^2$  stainless steel mesh (SSN), copper foil (CF), nickel mesh (NM), carbon cloth (CC) and nickel foam (NF), respectively.

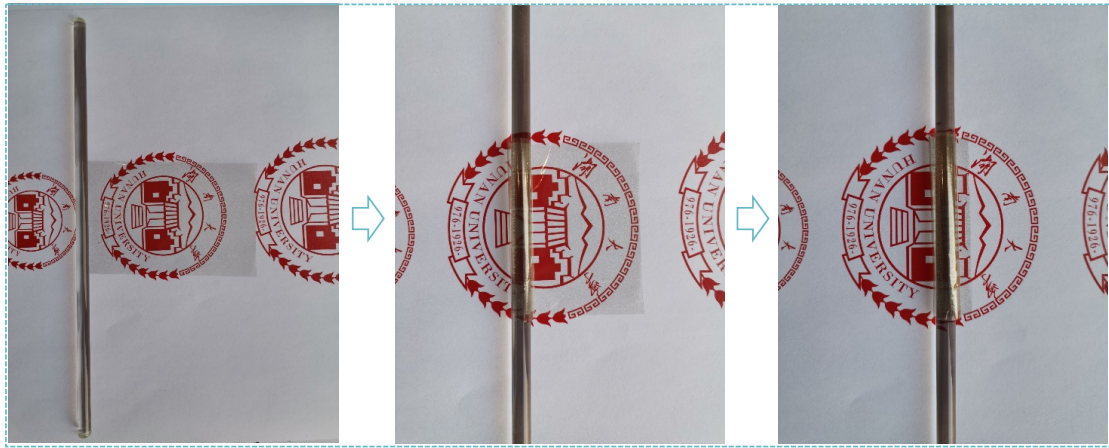

**Fig 4.** The crimping process of transparent NM on a glass rod.

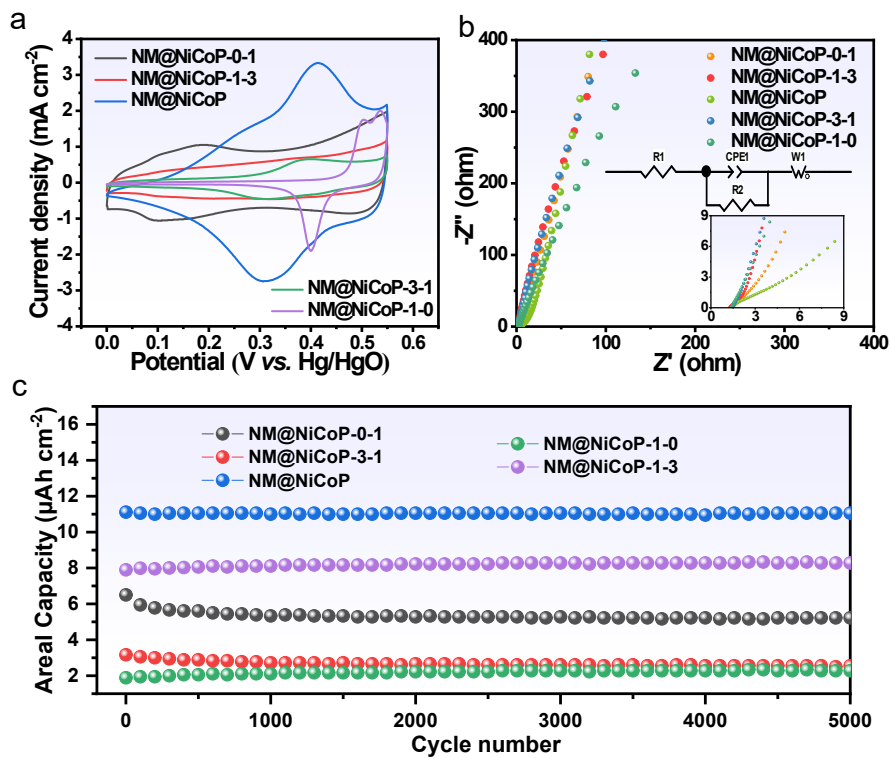

**Fig 5.** (a) CV curves of NM@NiCoP- $x$ - $y$  in the voltage range of 0–0.55 V at a scan rate of 20  $\text{mV s}^{-1}$ . (b) Electrochemical impedance spectroscopy (EIS) of NM@NiCoP- $x$ - $y$  in the frequency range of 100 kHz to 0.01 Hz. (c) Cycling stability of NM@NiCoP- $x$ - $y$  at a current density of  $2 \text{ mA cm}^{-2}$ .

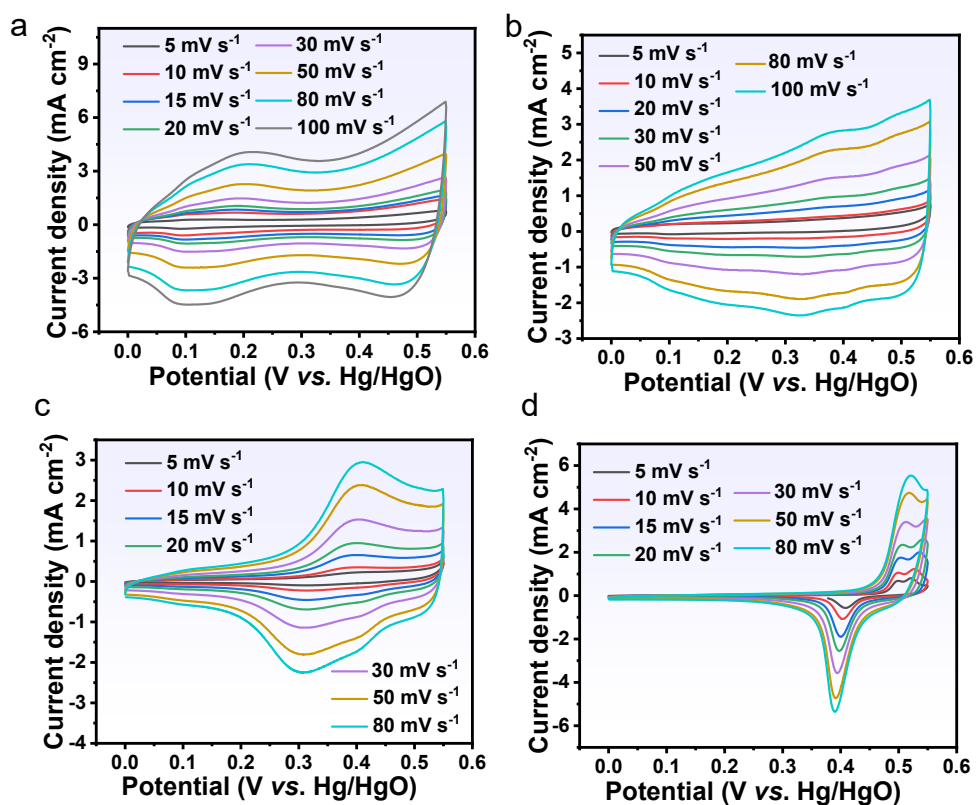

**Fig 6.** The respective CV curves of (a) NM@NiCoP-0-1, (b) NM@NiCoP-1-3, (c) NM@NiCoP-3-1 and (d) NM@NiCoP-1-0 at different scan rates.



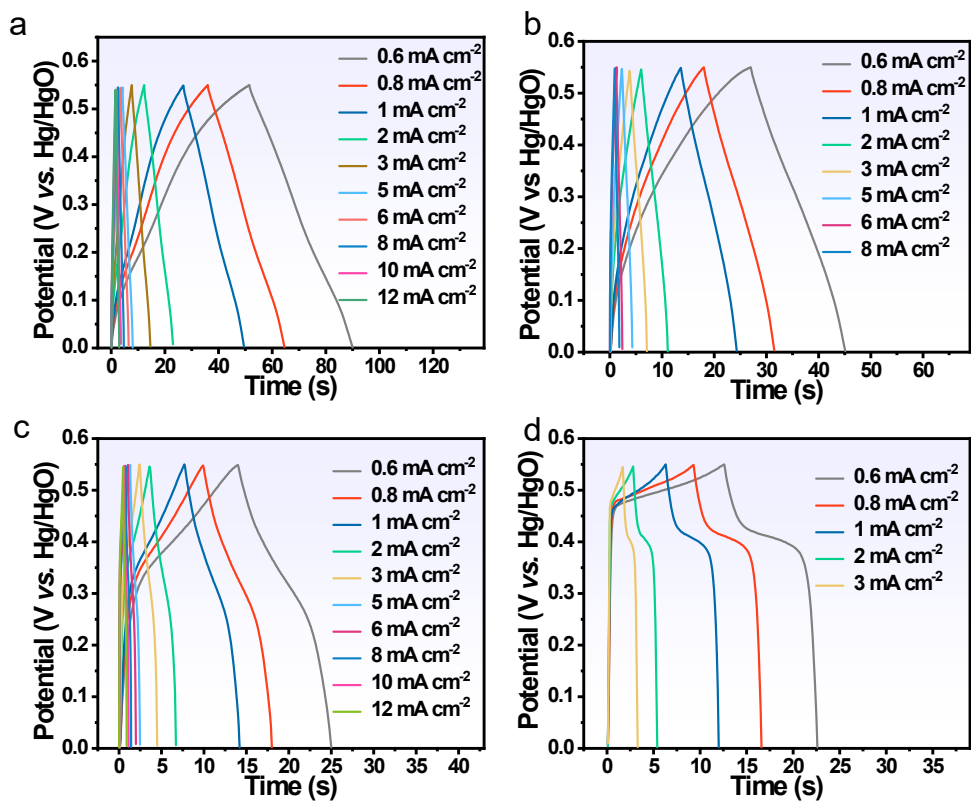

**Fig 7.** GCD curves of (a) NM@NiCoP-0-1, (b) NM@NiCoP-1-3, (c) NM@NiCoP-3-1 and (d) NM@NiCoP-1-0 at various current densities.

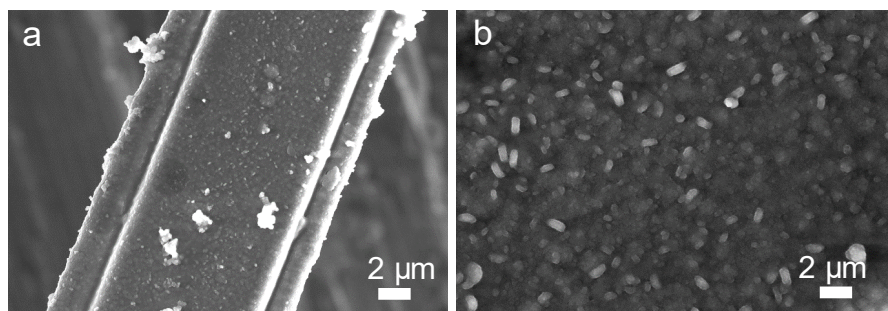

**Fig 8.** SEM images of NM@NiCoP electrode after 20,000 GCD cycles.

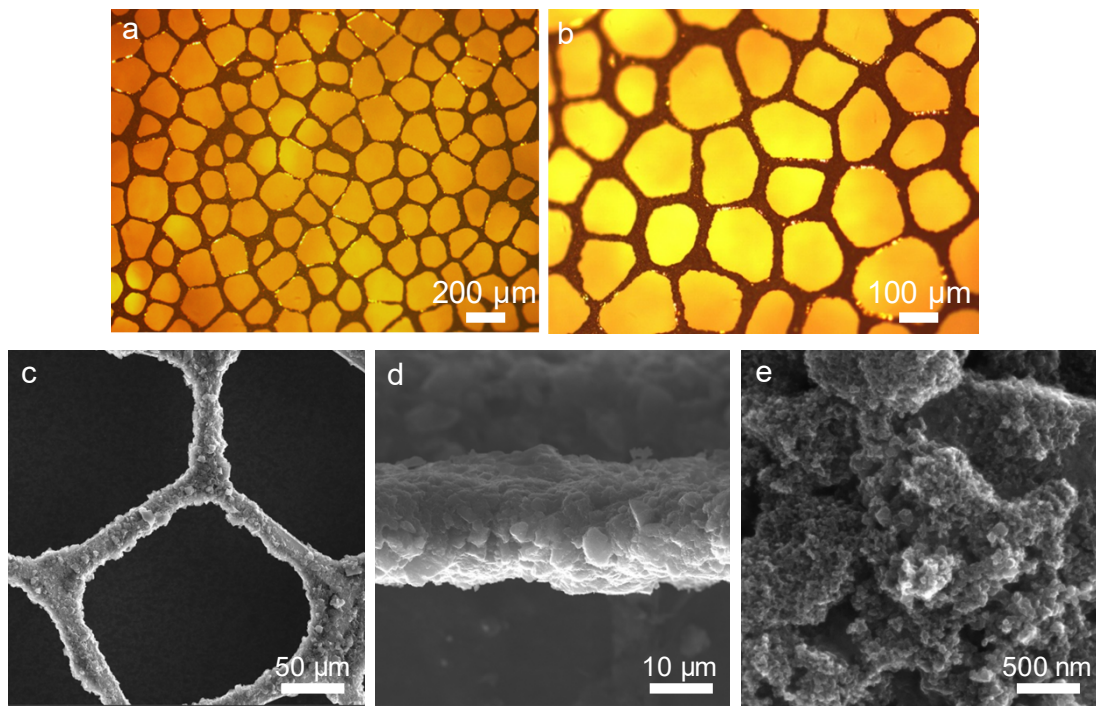

**Fig 9** (a,b) Optical microscope image of NM@NPC electrode. (c) SEM image of NM@NPC electrode. (d) SEM image of the cross-sectional thickness of the NM@NPC electrode. (e) Magnified SEM image of NPC active material.

**Fig 10.** Electrochemical performance of the NM@NPC. (a) CV curves, (b) GCD curves and (c) Nyquist impedance spectra of the NM@NPC. (d) Rate performance and (e) Capacity retention for 10,000 cycles of the NM@NPC.

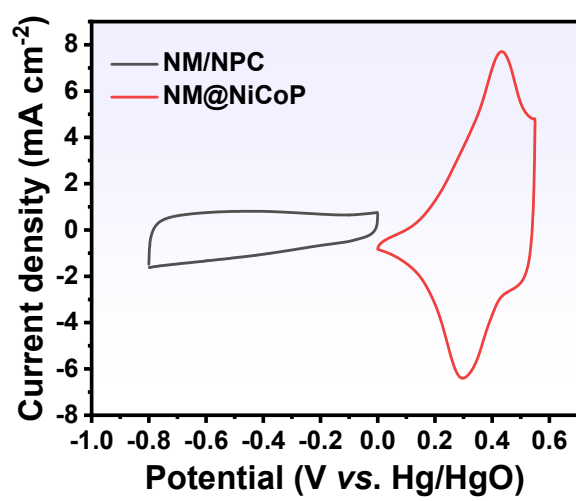

**Fig 11.** CV plots of the NPC anode and NM@NiCoP cathode performed in 2 M KOH at 50 mV s<sup>-1</sup>.

**Fig 12.** (a) CV curves obtained at different scanning rates from 5 to 100 mV s<sup>-1</sup>. (b) GCD curves of at various current densities from 1 to 12 mA cm<sup>-2</sup>. (c) The Nyquist impedance spectra of the aqueous electrolyte device. (d) Rate capability of the device at various current rates. (e) Cycling performance of the device at a current density of 2 mA cm<sup>-2</sup>.

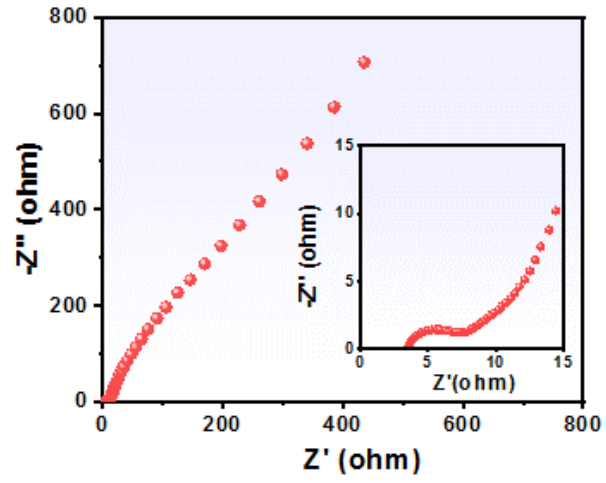

**Fig 13.** The Nyquist impedance spectra of the NM@NiCoP//PVA/KOH//NM@NPC device.

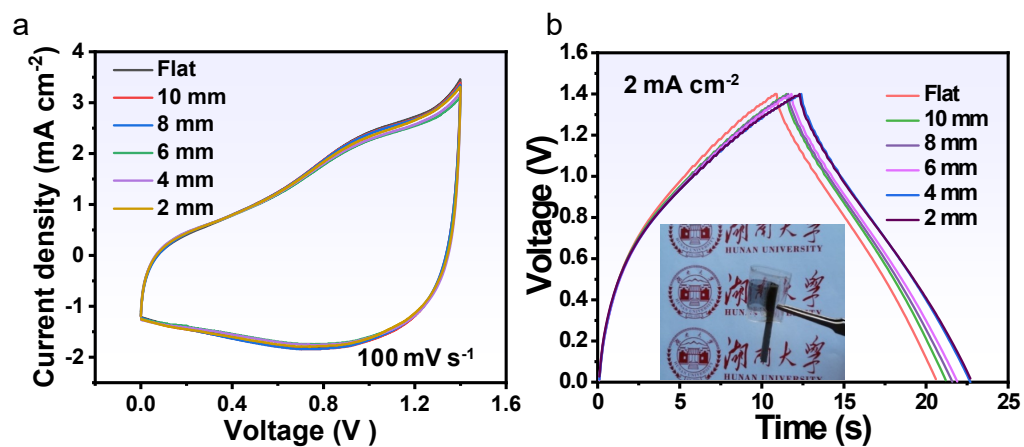

**Fig 14.** (a) CV curves of the all–solid–state device being bent from the flat to the radius of curvature of 2 mm. (b) GCD curves of the device being bent from the flat to the radius of curvature of 2 mm (Insert image: optical photo of the device being bent).



**Table S1.** Performance comparison of flexible transparent energy supercapacitors

| Electrode material                               | T <sub>E</sub> (%)<br>(550nm) | T <sub>D</sub> (%)<br>(550nm) | Gel<br>electrolyte                  | Device<br>type | Voltage<br>window(V) | Cycle<br>performance                        | Areal<br>capacity                                                                  | Energy density              | Power density            | Ref.         |
|--------------------------------------------------|-------------------------------|-------------------------------|-------------------------------------|----------------|----------------------|---------------------------------------------|------------------------------------------------------------------------------------|-----------------------------|--------------------------|--------------|
| NM@NiCoP//NM@NPC                                 | 80.2                          | 67.5                          | PVA/KOH                             | √              | 1.4                  | 50000, 97.6%<br>(10 mA cm <sup>-2</sup> )   | 21.1 mF cm <sup>-2</sup><br>8.2 μAh cm <sup>-2</sup><br>(0.6 mA cm <sup>-2</sup> ) | 8.0 μWh cm <sup>-2</sup>    | 980 μW cm <sup>-2</sup>  | This<br>work |
| MnO <sub>2</sub> -Au-Ni//MnO <sub>2</sub> -Au-Ni | 73                            | 62                            | PVA/LiCl                            | ×              | 0.8                  | /                                           | 34.8 mF cm <sup>-2</sup><br>(0.01V s <sup>-1</sup> )                               | /                           | /                        | [1]          |
| Au@MnO <sub>2</sub> //Au@MnO <sub>2</sub>        | 60                            | 36                            | LiClO <sub>4</sub> /PVA             | ×              | 1.0                  | /                                           | 795 μF cm <sup>-2</sup><br>(5 μA cm <sup>-2</sup> )                                | /                           | /                        | [2]          |
| 2L Gr//2L Gr                                     | 78.7                          | 75                            | PVA/H <sub>2</sub> SO <sub>4</sub>  | ×              | 0.8                  | /                                           | 99.4 mF cm <sup>-2</sup><br>(1.8 μA cm <sup>-2</sup> )                             | /                           | /                        | [3]          |
| Au/GP//Au/GP                                     | 69.3                          | 59                            | PVA/H <sub>2</sub> SO <sub>4</sub>  | ×              | 1.0                  | 20000, 95.4%<br>(0.3 mA cm <sup>-2</sup> )  | 3.3 mF cm <sup>-2</sup>                                                            | 430 μWh cm <sup>-3</sup>    | 190 mW cm <sup>-3</sup>  | [4]          |
| PEDOT:PSS//PEDOT:PSS                             | 78                            | 55-67                         | H <sub>3</sub> PO <sub>4</sub> /PVA | ×              | 0.8                  | 1000, 100%<br>(0.01 mA cm <sup>-2</sup> )   | 4.72 mFcm <sup>-2</sup>                                                            | 0.074 mW h cm <sup>-2</sup> | 0.036 W cm <sup>-2</sup> | [5]          |
| MnO <sub>2</sub> @Ni//MnO <sub>2</sub> @Ni       | 83.91                         | 80.82                         | PVA/LiCl                            | ×              | 0.8                  | 10000, 100%<br>(20 V s <sup>-1</sup> )      | 10.6 mF cm <sup>-2</sup><br>(10 mV s <sup>-1</sup> )                               | /                           | /                        | [6]          |
| Gr@Ag//Gr@Ag                                     | 74                            | 65                            | PVA/H <sub>3</sub> PO <sub>4</sub>  | ×              | 1.0                  | 10000, 100%<br>(0.024 mA cm <sup>-2</sup> ) | 0.3 mF cm <sup>-2</sup><br>(0.1 V s <sup>-1</sup> )                                | 9.7 nWh cm <sup>-2</sup>    | 2.5 μW cm <sup>-2</sup>  | [7]          |
| PPy/AuLV//PPy/AuLV                               | 65                            | 45                            | PVA/LiCl                            | ×              | 0.6                  | 2500, 83%<br>(1mA cm <sup>-2</sup> )        | 5.6 mF cm <sup>-2</sup><br>(1 mA cm <sup>-2</sup> )                                | 0.28 μWh cm <sup>-2</sup>   | 80 μW cm <sup>-2</sup>   | [8]          |
| AgNW/PEDOT:PSS//<br>AgNW/PEDOT:PSS               | 80                            | /                             | H <sub>3</sub> PO <sub>4</sub> /PVA | ×              | 1.0                  | 2500, 90%<br>(0.25 mA cm <sup>-2</sup> )    | 8.58 mF cm <sup>-2</sup><br>(0.1 mA cm <sup>-2</sup> )                             | /                           | /                        | [9]          |

|                                                                              |                |      |                                     |   |     |                                           |                                                          |                            |                           |      |
|------------------------------------------------------------------------------|----------------|------|-------------------------------------|---|-----|-------------------------------------------|----------------------------------------------------------|----------------------------|---------------------------|------|
| AgNW@NiCo/NiCo(OH) <sub>2</sub> //<br>Ag NW/graphene                         | 54             | 36   | PVA/LiClO <sub>4</sub> /<br>KOH     | √ | 0.7 | 5000, 91.9%<br>(100 mV s <sup>-1</sup> )  | 9.6 mF cm <sup>-2</sup><br>(0.2 mA cm <sup>-2</sup> )    | 3.0 W h kg <sup>-1</sup>   | 3.5 W kg <sup>-1</sup>    | [10] |
| MnO <sub>2</sub> @Au-Ni//<br>MnO <sub>2</sub> @Au-Ni                         | 69.4           | 60   | PVA/LiCl                            | × | 0.8 | 10000, 96.5%<br>(100V s <sup>-1</sup> )   | 78.46 mF cm <sup>-2</sup><br>(100 Vs <sup>-1</sup> )     | /                          | /                         | [11] |
| LSMCS//LSMCS                                                                 | 85–88          | 80   | PVA/H <sub>3</sub> PO <sub>4</sub>  | × | 1.6 | 5000, 57.9%<br>10 mV s <sup>-1</sup>      | 0.19 mF cm <sup>-2</sup><br>(10 mV s <sup>-1</sup> )     | 0.068 μWh cm <sup>-2</sup> | 47.08 μWcm <sup>-2</sup>  | [12] |
| Co(OH) <sub>2</sub> /AgNW//<br>Co(OH) <sub>2</sub> /AgNW                     | 90             | 54   | PVA/KCl                             | × | 0.6 | 10000, 91%                                | 540 μC cm <sup>-2</sup><br>(10mV s <sup>-1</sup> )       | 0.04 μWh cm <sup>-2</sup>  | 28.8 mW cm <sup>-2</sup>  | [13] |
| PEDOT:PSS/AgNFs//<br>PEDOT:PSS/AgNFs                                         | 84.7           | 77   | H <sub>2</sub> SO <sub>4</sub> /PVA | × | 1.0 | 10000, 95%<br>(37 μA cm <sup>-2</sup> )   | 0.91 mF cm <sup>-2</sup><br>(5 mV s <sup>-1</sup> )      | 0.09 μWh cm <sup>-2</sup>  | 0.93 μW cm <sup>-2</sup>  | [14] |
| MnO <sub>2</sub> @AuNFs//<br>MnO <sub>2</sub> @AuNFs                         | 93.13          | 79   | LiCl/PVA                            | × | 0.8 | 10000, 94%<br>(75 μA cm <sup>-2</sup> )   | 2.07 mF cm <sup>-2</sup><br>(5 mV s <sup>-1</sup> )      | 0.14 μWh cm <sup>-2</sup>  | 4 μW cm <sup>-2</sup>     | [15] |
| Co(OH) <sub>2</sub> @Ni//Co(OH) <sub>2</sub> @Ni                             | 75             | 54   | PVA/KOH                             | × | 0.6 | 10000, 90%<br>(0.09 mA cm <sup>-2</sup> ) | 5.32 mF cm <sup>-2</sup><br>(5 mV s <sup>-1</sup> )      | 0.42 μWh cm <sup>-2</sup>  | 8.33 μW cm <sup>-2</sup>  | [16] |
| SWCNT/ITO//SWCNT/ITO                                                         | /              | 57.4 | PVA/LiCl-<br>PS                     | × | 0.8 | 10000, 95.3%<br>(20 μA cm <sup>-2</sup> ) | 120.7 μF cm <sup>-2</sup>                                | /                          | /                         | [17] |
| MnO <sub>2</sub> /AuNF//MnO <sub>2</sub> /AuNF                               | 71             | 60   | LiClO <sub>4</sub> /PVA             | × | 1.0 | 500, 95%<br>(0.06 mA cm <sup>-2</sup> )   | 3.68 mF cm <sup>-2</sup>                                 | 56 μWh cm <sup>-2</sup>    | 0.51 μW cm <sup>-2</sup>  | [18] |
| Ag/porous carbon//<br>Ag/Ni <sub>x</sub> Fe <sub>y</sub> O <sub>z</sub> @rGO | 84.2//86.<br>3 | 70.6 | PVDF-HFP/<br>LiTFSI                 | √ | 2.5 | 1000, 88.2%<br>(60 μA cm <sup>-2</sup> )  | 226.8 μF cm <sup>-2</sup><br>(3 μA cm <sup>-2</sup> )    | 2.7 mWh L <sup>-1</sup>    | 1002.5 mW L <sup>-1</sup> | [19] |
| Cu@Ni@NiCoS NF//<br>Cu@Ni@NiCoS NF                                           | 89             | 65   | PVA/KOH                             | × | 0.6 | 10000, 89%<br>(0.6 mA cm <sup>-2</sup> )  | 1.21μAh cm <sup>-2</sup><br>(0.025 mA cm <sup>-2</sup> ) | 0.48 μWh cm <sup>-2</sup>  | 11.15 μW cm <sup>-2</sup> | [20] |

|                                                                          |       |      |                                    |   |     |                                            |                                                          |                              |                            |      |
|--------------------------------------------------------------------------|-------|------|------------------------------------|---|-----|--------------------------------------------|----------------------------------------------------------|------------------------------|----------------------------|------|
| PEDOT:PSS// PEDOT:PSS                                                    | 60    | /    | PVA/H <sub>3</sub> PO <sub>4</sub> | × | 1.0 | 3000, 96.8%<br>(0.2 mA cm <sup>-2</sup> )  | 1.32 mF cm <sup>-2</sup><br>(0.1 mA cm <sup>-2</sup> )   | 0.183 μWh cm <sup>-2</sup>   | 4.98 μW cm <sup>-2</sup>   | [21] |
| Ni@MnO <sub>2</sub> /Ni@MnO <sub>2</sub>                                 | 80    | 77   | PVA/LiCl                           | × | 0.8 | 10000, 98.6%<br>(10 V s <sup>-1</sup> )    | 19.65 mF cm <sup>-2</sup>                                | /                            | /                          | [22] |
| AgNFs/MoO <sub>3</sub> /PEDOT:PSS//<br>AgNFs/MoO <sub>3</sub> /PEDOT:PSS | 82.8  | 64.5 | PVA/LiCl                           | × | 0.8 | 15000, 86.6%<br>(0.2 mA cm <sup>-2</sup> ) | 7.0 mF cm <sup>-2</sup><br>(0.1 mA cm <sup>-2</sup> )    | 0.623 mWh cm <sup>-2</sup>   | 40 mW cm <sup>-2</sup>     | [23] |
| MoS <sub>2</sub> /AIP//MoS <sub>2</sub> /AIP                             | 79.56 | /    | PVA/KOH                            | × | 1.0 | /                                          | 207 mF cm <sup>-2</sup><br>(6 mA cm <sup>-2</sup> )      | 28.78 μWh cm <sup>-2</sup>   | 1.03 mW cm <sup>-2</sup>   | [24] |
| PEDOT//AgNWs/NaxWO <sub>3</sub> /<br>PEDOT                               | /     | 55   | PVA/H <sub>2</sub> SO <sub>4</sub> | √ | 1.2 | 2000, 80%<br>(0.15 mA cm <sup>-2</sup> )   | 0.332 mF cm <sup>-2</sup><br>(0.05 mA cm <sup>-2</sup> ) | 2.03–0.72 Wh m <sup>-2</sup> | 393–1299 W m <sup>-2</sup> | [25] |
| TSBL–MQD/LRGO                                                            | 91.14 | 80   | PVA/H <sub>2</sub> SO <sub>4</sub> | × | 1.2 | 12000, 97.6%<br>(0.9 mA cm <sup>-2</sup> ) | 10.42 mF cm <sup>-2</sup>                                | 40.8 Wh kg <sup>-1</sup>     | 2513.7 W kg <sup>-1</sup>  | [26] |

Note: T<sub>E</sub> stands for the optical transmittance of the electrode, and T<sub>D</sub> represents the optical transmittance of the device; “√” indicates that the device is an asymmetric device, and “×” indicates that the device is a symmetric device.

## Reference

- [1] Y. Zhao, Z. Jiang, Y. Weng, Y.-H. Liu, Transparent, stretchable and high-performance supercapacitors based on freestanding Ni-mesh electrode, IOP Conference Series: Earth and Environmental Science 675(1) (2021) 012105, <https://doi.org/10.1088/1755-1315/675/1/012105>.
- [2] T. Qiu, B. Luo, M. Giersig, E.M. Akinoglu, L. Hao, X. Wang, L. Shi, M. Jin, L. Zhi, Au@MnO<sub>2</sub> Core-Shell Nanomesh Electrodes for Transparent Flexible Supercapacitors, Small 10(20) (2014) 4136-4141, <https://doi.org/10.1002/sml.201401250>.
- [3] K. Jo, S. Lee, S.-M. Kim, J.B. In, S.-M. Lee, J.-H. Kim, H.-J. Lee, K.-S. Kim, Stacked Bilayer Graphene and Redox-Active Interlayer for Transparent and Flexible High-Performance Supercapacitors, Chem. Mater. 27(10) (2015) 3621-3627, <https://doi.org/10.1021/cm504801r>.
- [4] N. Li, G. Yang, Y. Sun, H. Song, H. Cui, G. Yang, C. Wang, Free-Standing and Transparent Graphene Membrane of Polyhedron Box-Shaped Basic Building Units Directly Grown Using a NaCl Template for Flexible Transparent and Stretchable Solid-State Supercapacitors, Nano Lett. 15(5) (2015) 3195-3203, <https://doi.org/10.1021/acs.nanolett.5b00364>.
- [5] T. Cheng, Y.-Z. Zhang, J.-D. Zhang, W.-Y. Lai, W. Huang, High-performance free-standing PEDOT:PSS electrodes for flexible and transparent all-solid-state supercapacitors, Journal of Materials Chemistry A 4(27) (2016) 10493-10499, <https://doi.org/10.1039/C6TA03537J>.
- [6] Y.-H. Liu, J.-L. Xu, X. Gao, Y.-L. Sun, J.-J. Lv, S. Shen, L.-S. Chen, S.-D. Wang, Freestanding transparent metallic network based ultrathin, foldable and designable supercapacitors, Energy & Environmental Science 10(12) (2017) 2534-2543, <https://doi.org/10.1039/C7EE02390A>.
- [7] Y. Zhong, X. Zhang, Y. He, H. Peng, G. Wang, G. Xin, Simultaneously Armored and Active Graphene for Transparent and Flexible Supercapacitors, Adv. Funct. Mater. 28(28) (2018) 1801998, <https://doi.org/10.1002/adfm.201801998>.

- [8] S. Chen, B. Shi, W. He, X. Wu, X. Zhang, Y. Zhu, S. He, H. Peng, Y. Jiang, X. Gao, Z. Fan, G. Zhou, J.-M. Liu, K. Kempa, J. Gao, Quasifractal Networks as Current Collectors for Transparent Flexible Supercapacitors, *Adv. Funct. Mater.* 29(48) (2019) 1906618, <https://doi.org/10.1002/adfm.201906618>.
- [9] D. Li, X. Liu, X. Chen, W.-Y. Lai, W. Huang, A Simple Strategy towards Highly Conductive Silver-Nanowire Inks for Screen-Printed Flexible Transparent Conductive Films and Wearable Energy-Storage Devices, *Advanced Materials Technologies* 4(8) (2019) 1900196, <https://doi.org/10.1002/admt.201900196>.
- [10] J. Liu, G. Shen, S. Zhao, X. He, C. Zhang, T. Jiang, J. Jiang, B. Chen, A one-dimensional Ag NW@NiCo/NiCo(OH)<sub>2</sub> core-shell nanostructured electrode for a flexible and transparent asymmetric supercapacitor, *Journal of Materials Chemistry A* 7(14) (2019) 8184-8193, <https://doi.org/10.1039/C9TA01303B>.
- [11] Y.-H. Liu, Z.-Y. Jiang, J.-L. Xu, Self-Standing Metallic Mesh with MnO<sub>2</sub> Multiscale Microstructures for High-Capacity Flexible Transparent Energy Storage, *ACS Applied Materials & Interfaces* 11(27) (2019) 24047-24056, <https://doi.org/10.1021/acsami.9b05033>.
- [12] D.D. Nguyen, C.-H. Hsiao, T.-Y. Su, P.-Y. Hsieh, Y.-L. Chen, Y.-L. Chueh, C.-Y. Lee, N.-H. Tai, Bioinspired networks consisting of spongy carbon wrapped by graphene sheath for flexible transparent supercapacitors, *Communications Chemistry* 2(1) (2019) 137, <https://doi.org/10.1038/s42004-019-0238-9>.
- [13] H. Sheng, X. Zhang, Y. Ma, P. Wang, J. Zhou, Q. Su, W. Lan, E. Xie, C.J. Zhang, Ultrathin, Wrinkled, Vertically Aligned Co(OH)<sub>2</sub> Nanosheets/Ag Nanowires Hybrid Network for Flexible Transparent Supercapacitor with High Performance, *ACS Applied Materials & Interfaces* 11(9) (2019) 8992-9001, <https://doi.org/10.1021/acsami.8b18609>.
- [14] S.B. Singh, T. Kshetri, T.I. Singh, N.H. Kim, J.H. Lee, Embedded PEDOT:PSS/AgNFs network flexible transparent electrode for solid-state supercapacitor, *Chem. Eng. J.* 359 (2019) 197-207, <https://doi.org/10.1016/j.cej.2018.11.160>.
- [15] S.B. Singh, T.I. Singh, N.H. Kim, J.H. Lee, A core-shell MnO<sub>2</sub>@Au nanofiber

- network as a high-performance flexible transparent supercapacitor electrode, *Journal of Materials Chemistry A* 7(17) (2019) 10672-10683, <https://doi.org/10.1039/C9TA00778D>.
- [16] B.S. Soram, J. Dai, T. Kshetri, N.H. Kim, J.H. Lee, Vertically grown and intertwined Co(OH)<sub>2</sub> nanosheet@Ni-mesh network for transparent flexible supercapacitor, *Chem. Eng. J.* 391 (2020) 123540, <https://doi.org/10.1016/j.cej.2019.123540>.
- [17] J. Chen, W. Xiao, T. Hu, P. Chen, T. Lan, P. Li, Y. Li, B. Mi, Y. Ma, Controlling Electrode Spacing by Polystyrene Microsphere Spacers for Highly Stable and Flexible Transparent Supercapacitors, *ACS Applied Materials & Interfaces* 12(5) (2020) 5885-5891, <https://doi.org/10.1021/acsami.9b19878>.
- [18] Y. Lee, S. Chae, H. Park, J. Kim, S.-H. Jeong, Stretchable and transparent supercapacitors based on extremely long MnO<sub>2</sub>/Au nanofiber networks, *Chem. Eng. J.* 382 (2020) 122798, <https://doi.org/10.1016/j.cej.2019.122798>.
- [19] T. Liu, R. Yan, H. Huang, L. Pan, X. Cao, A. deMello, M. Niederberger, A Micromolding Method for Transparent and Flexible Thin-Film Supercapacitors and Hybrid Supercapacitors, *Adv. Funct. Mater.* 30(46) (2020) 2004410, <https://doi.org/10.1002/adfm.202004410>.
- [20] B.S. Soram, I.S. Thangjam, J.Y. Dai, T. Kshetri, N.H. Kim, J.H. Lee, Flexible transparent supercapacitor with core-shell Cu@Ni@NiCoS nanofibers network electrode, *Chem. Eng. J.* 395 (2020) 125019, <https://doi.org/10.1016/j.cej.2020.125019>.
- [21] X. Guan, L. Pan, Z. Fan, Flexible, Transparent and Highly Conductive Polymer Film Electrodes for All-Solid-State Transparent Supercapacitor Applications, *Membranes* 11(10) (2021), <https://doi.org/10.3390/membranes11100788>.
- [22] Z.-Y. Jiang, Y.-Y. Zhao, W. Huang, J.-L. Xu, L.-S. Chen, Y.-H. Liu, Hierarchically nanobranch structured freestanding metallic mesh electrode for high-performance transparent flexible supercapacitor, *J. Alloys Compd.* 861 (2021) 158593, <https://doi.org/10.1016/j.jallcom.2020.158593>.
- [23] J. Liang, H. Sheng, Q. Wang, J. Yuan, X. Zhang, Q. Su, E. Xie, W. Lan, C. Zhang,

- PEDOT:PSS-glued MoO<sub>3</sub> nanowire network for all-solid-state flexible transparent supercapacitors, *Nanoscale Advances* 3(12) (2021) 3502-3512, <https://doi.org/10.1039/D1NA00121C>.
- [24] V. Raman, D. Rhee, A.R. Selvaraj, J. Kim, K. Prabakar, J. Kang, H.-K. Kim, High-performance flexible transparent micro-supercapacitors from nanocomposite electrodes encapsulated with solution processed MoS<sub>2</sub> nanosheets, *Science and Technology of Advanced Materials* 22(1) (2021) 875-884, <https://doi.org/10.1080/14686996.2021.1978274>.
- [25] W.-M. Huang, C.-Y. Hsu, D.-H. Chen, Sodium tungsten oxide nanowires-based all-solid-state flexible transparent supercapacitors with solar thermal enhanced performance, *Chem. Eng. J.* 431 (2022) 134086, <https://doi.org/10.1016/j.cej.2021.134086>.
- [26] Y. Yuan, L. Jiang, X. Li, P. Zuo, X. Zhang, Y. Lian, Y. Ma, M. Liang, Y. Zhao, L. Qu, Ultrafast Shaped Laser Induced Synthesis of MXene Quantum Dots/Graphene for Transparent Supercapacitors, *Adv. Mater.* 34(12) (2022) 2110013, <https://doi.org/10.1002/adma.202110013>.
